# Supplementary material for: The Effect of Matrix Composition on the Deformation and Failure Mechanisms in Metal Matrix Syntactic Foams during Compression
Source: PubMed Central journal article supplement (PMC5459142; doi:10.3390/ma10020196), 2017-02-17
Supplement: materials-10-00196-s001.pdf [file materials-10-00196-s001.pdf]

Supplementary data have been uploaded to Google Drive: <http://bit.ly/2kbLTGH>
